# Supplementary material
Source: PubMed Central journal article supplement (PMC6486884)

## Supplementary Table 1.

| Question                                                                                                                                 | Results                                                                                                                                                                                                                                                                                                                  | Figure/ Table                                                                                                                                          |
|------------------------------------------------------------------------------------------------------------------------------------------|--------------------------------------------------------------------------------------------------------------------------------------------------------------------------------------------------------------------------------------------------------------------------------------------------------------------------|--------------------------------------------------------------------------------------------------------------------------------------------------------|
| What cells in the human omentum and human omental metastasis of ovarian cancer (OvCa) express fascin?                                    | Mesothelial cells (HPMCs), cancer-associated fibroblasts (CAFs) and OvCa cells (higher at stromal-interface) express fascin in human omentum and omental metastases of OvCa. In primary tumors fascin expression is higher in the stromal compartment versus the cancer compartment of tumors.                           | 1a, 1b, ST1                                                                                                                                            |
| Are fascin levels in OvCa tumors associated with survival or clinicopathologic data?                                                     | Fascin levels are negatively correlated with survival in non-serous OvCa patients. Fascin levels in serous papillary OvCa are not associated with survival of patients. Fascin levels were significantly correlated with histology type, pathology type and FIGO stage.                                                  | 1c, 1d, S1, ST2, ST3                                                                                                                                   |
| In culture, do HPMCs, CAFs and OvCa cells express fascin?                                                                                | HPMCs, CAFs and OvCa cells express fascin. OvCa cells express fascin at different levels. The cell lines used in this manuscript express high (Tyk-nu), medium (HeyA8), low (Ovcar5) and no (Snu119) fascin.                                                                                                             | 2a, 2b, 2c                                                                                                                                             |
| Does inhibition or knockdown of fascin effect OvCa or stromal cell adhesion, migration, invasion, proliferation, viability or apoptosis? | Inhibition of fascin with G2 or knockdown of fascin inhibits OvCa and stromal cell migration in multiple migration assays. Inhibition or knockdown of fascin does not effect cellular adhesion, invasion, viability or apoptosis.                                                                                        | migration:3a, 3b, 4a, 4b, 4c, 4d, 4e;<br>adhesion: S2a, S2b; invasion: S3a, S3b,<br>S3c, S3d; proliferation: S4a, S4b;<br>viability: S5; apoptosis: S6 |
| Does inhibition of fascin block actin-bundling?                                                                                          | Inhibition of fascin with G2 blocks actin-bundling.                                                                                                                                                                                                                                                                      | 5a                                                                                                                                                     |
| Does inhibition of fascin block GTPase activity?                                                                                         | Inhibition of fascin with G2 inhibits CDC42 and Rac1 GTPase activity                                                                                                                                                                                                                                                     | 5b, 5c, 5d, 5e                                                                                                                                         |
| Does inhibition or knockdown of fascin effect OvCa metastasis?                                                                           | Knockdown of fascin in OvCa cells inhibits metastasis to a lesser extent than treatment with the fascin inhibitor, G2. Inhibition of fascin with G2 blocks OvCa metastasis and prevents OvCa metastasis to the mouse omentum. Inhibition of fascin with G2 blocks OvCa colonization of human omentum in ex vivo culture. | 6a, 6b, 6c, 4f                                                                                                                                         |
| Does inhibition or knockdown of fascin in vivo effect OvCa proliferation, OvCa apoptosis or angiogenesis in tumors?                      | Knockdown of fascin in OvCa cells increased proliferation and apoptosis in OvCa cells in vivo, while no effect on vessel formation was detected. Inhibition of fascin with G2 has no effect on OvCa cell proliferation, OvCa cell apoptosis or vessel formation in vivo.                                                 | S7a, S7b                                                                                                                                               |

## Supplementary Table 2.

| <b>Cancer<br/>Fascin Expression<br/>Score (Mean)</b> | <b># of Patients</b> | <b>Percentage of<br/>Patients</b> |
|------------------------------------------------------|----------------------|-----------------------------------|
| 0                                                    | 76                   | 37.8                              |
| 0.5                                                  | 16                   | 8.0                               |
| 1                                                    | 36                   | 17.9                              |
| 1.5                                                  | 5                    | 2.5                               |
| 2                                                    | 38                   | 18.9                              |
| 2.5                                                  | 4                    | 2.0                               |
| 3                                                    | 26                   | 12.9                              |
| Total                                                | 201                  | 100                               |

| <b>Stroma<br/>Fascin Expression<br/>Score (Mean)</b> | <b># of Patients</b> | <b>Percentage of<br/>Patients</b> |
|------------------------------------------------------|----------------------|-----------------------------------|
| 0                                                    | 12                   | 6.0                               |
| 0.5                                                  | 2                    | 1.0                               |
| 1                                                    | 61                   | 30.3                              |
| 1.5                                                  | 15                   | 7.5                               |
| 2                                                    | 59                   | 29.3                              |
| 2.5                                                  | 17                   | 8.5                               |
| 3                                                    | 35                   | 17.4                              |
| Total                                                | 201                  | 100                               |

### Supplementary Table 3.

|                               | Overall<br>(n=201) | Negative (0)<br>(n=76) | Positive (>0)<br>(n=125) | P value |
|-------------------------------|--------------------|------------------------|--------------------------|---------|
| Tumor Site                    |                    |                        |                          | 0.31    |
| Fallopian Tube                | 22 (10.9)          | 5                      | 17                       |         |
| Ovary                         | 170 (84.6)         | 68                     | 102                      |         |
| Peritoneum                    | 9 (4.5)            | 3                      | 6                        |         |
| Histology type                |                    |                        |                          | 0.002   |
| ccc-ovary                     | 17 (8.5)           | 12                     | 5                        |         |
| endom ca-ovary                | 21 (10.4)          | 8                      | 13                       |         |
| ftp-fal tube                  | 21 (10.4)          | 5                      | 16                       |         |
| muc ca-ovary                  | 10 (5.0)           | 8                      | 2                        |         |
| ppp-perit                     | 7 (3.5)            | 2                      | 5                        |         |
| serpap ca-ovary               | 125 (62.2)         | 41                     | 84                       |         |
| Pathology type                |                    |                        |                          | <0.001  |
| Clear cell                    | 16 (8.0)           | 12                     | 4                        |         |
| Endom                         | 21 (10.4)          | 7                      | 14                       |         |
| Mucinous                      | 11 (5.5)           | 9                      | 2                        |         |
| Serpap                        | 153 (76.1)         | 48                     | 105                      |         |
| FIGO Stage                    |                    |                        |                          | 0.047   |
| I                             | 26 (12.9)          | 16                     | 10                       |         |
| II                            | 9 (4.5)            | 2                      | 7                        |         |
| III                           | 120 (59.7)         | 44                     | 76                       |         |
| IV                            | 46 (22.9)          | 14                     | 32                       |         |
| Ascites Volume                |                    |                        |                          | 0.65    |
| No                            | 105 (55.3)         | 37                     | 68                       |         |
| Yes                           | 85 (44.7)          | 33                     | 52                       |         |
| Chemo Class                   |                    |                        |                          | 0.56    |
| Gemcitabine                   | 2 (1.1)            | 1                      | 1                        |         |
| Other/Platinum                | 2 (1.1)            | 1                      | 1                        |         |
| Phase 1                       | 3 (1.6)            | 2                      | 1                        |         |
| Platinum only                 | 6 (3.3)            | 1                      | 5                        |         |
| Taxane Taxane/Platinum        | 2 (1.1)            | 0                      | 2                        |         |
|                               | 168 (91.8)         | 58                     | 110                      |         |
| Grade                         |                    |                        |                          | 0.32    |
| G1                            | 10 (5.0)           | 6                      | 4                        |         |
| G2                            | 44 (21.9)          | 17                     | 27                       |         |
| G3                            | 147 (73.1)         | 53                     | 94                       |         |
| Platinum Sensitivity          |                    |                        |                          | 0.67    |
| Resistant                     | 71 (39.4)          | 22                     | 49                       |         |
| Sensitive                     | 82 (45.6)          | 31                     | 51                       |         |
| Intermediate                  | 27 (15.0)          | 9                      | 18                       |         |
| Residual Tumor                |                    |                        |                          | 0.55    |
| > 1cm                         | 74 (36.8)          | 30                     | 44                       |         |
| ≤ 1cm                         | 127 (63.2)         | 46                     | 81                       |         |
| Chemo Type                    |                    |                        |                          | 1.00    |
| Adjuvant/1 <sup>st</sup> line | 155 (84.7)         | 53                     | 102                      |         |

# Supplementary Figure 1.

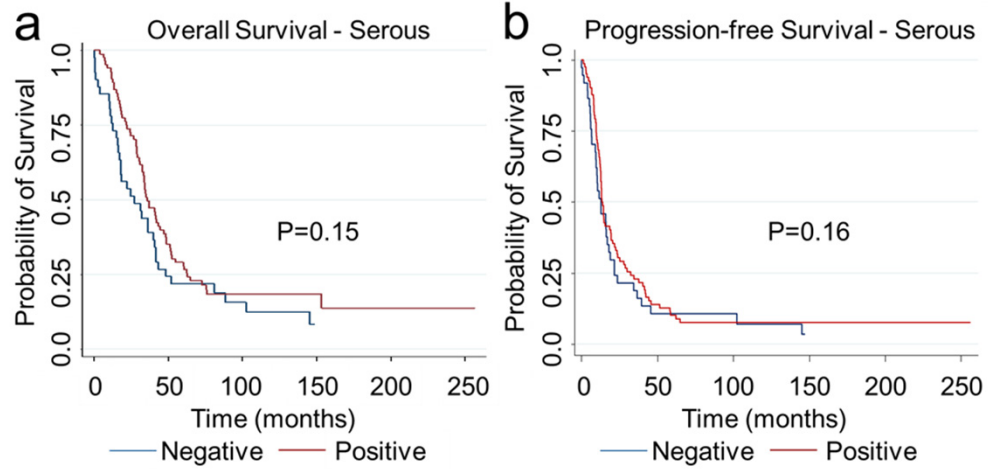

# Supplementary Figure 2.

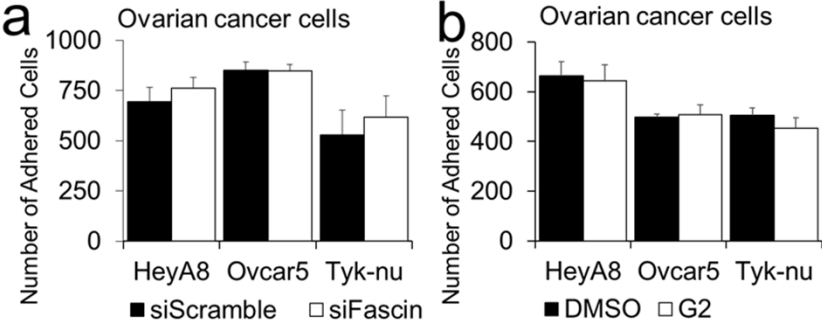

## Supplementary Figure 3.

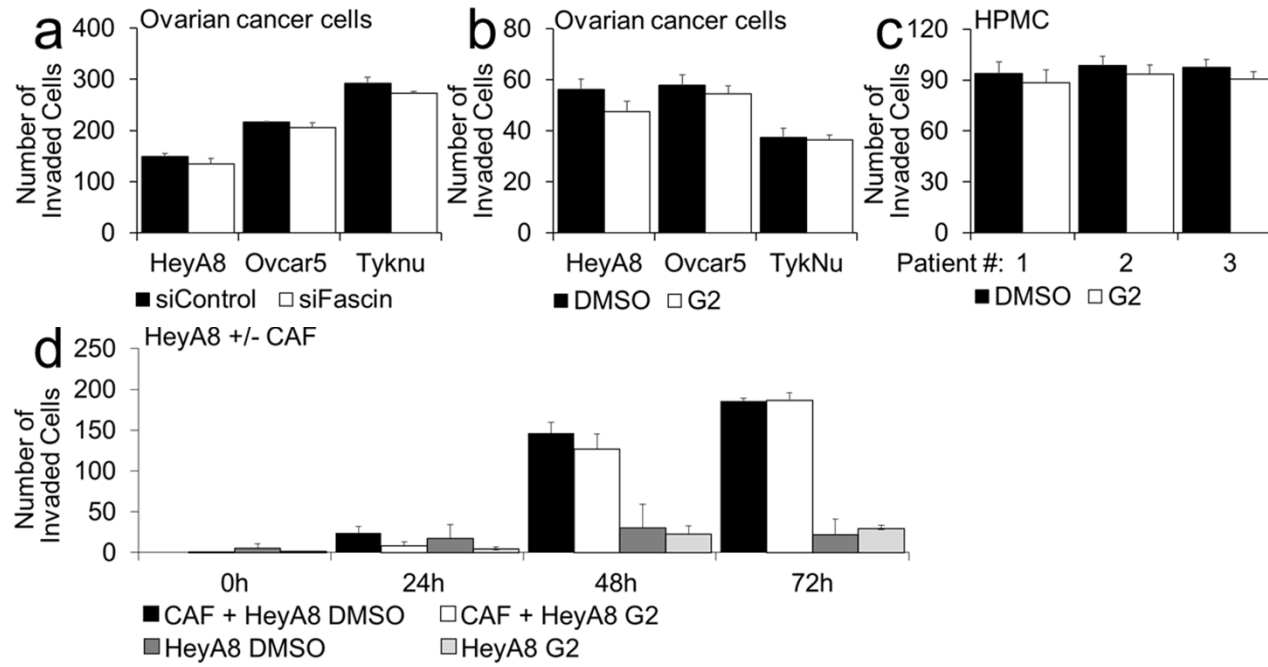

## Supplementary Figure 4.

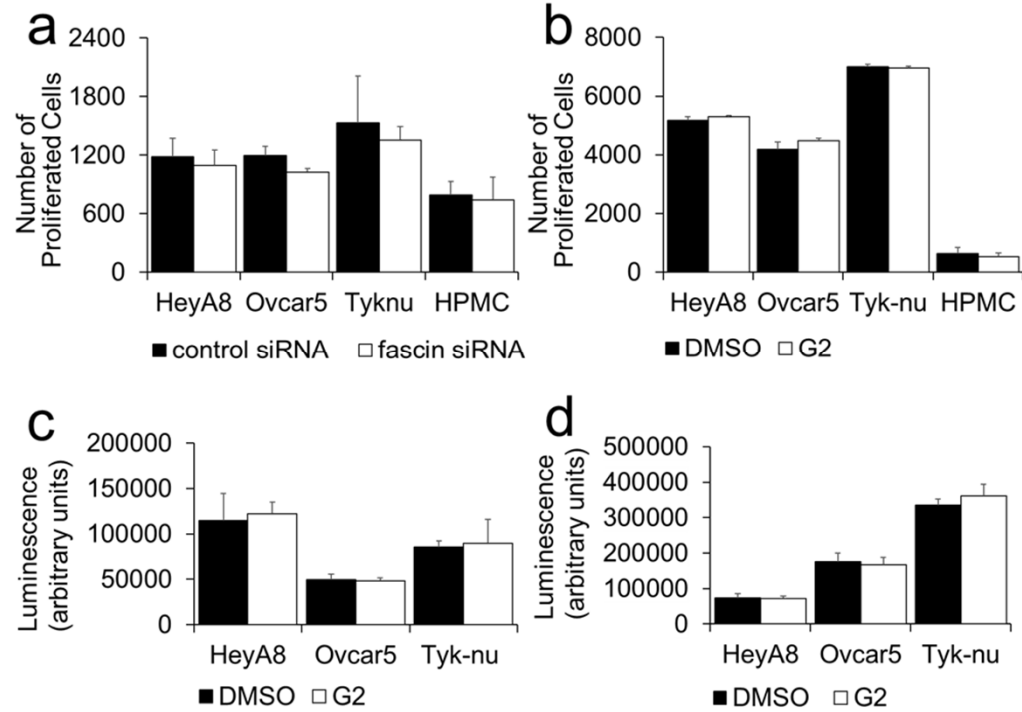

## Supplementary Figure 5.

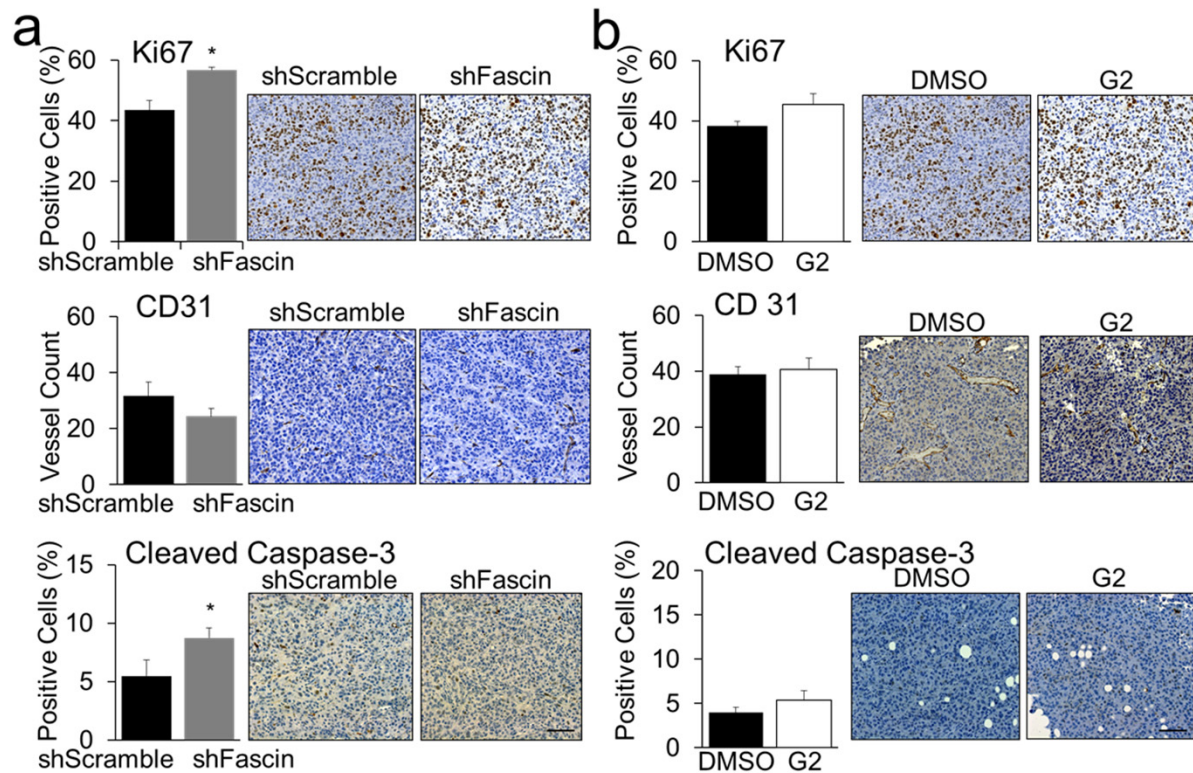

Supplement: NIHMS1522350-supplement-2.pdf [file NIHMS1522350-supplement-2.pdf]
